# Supplementary material
Source: Springer Nature journal article supplement (https://www.springermedizin.de/resource/supplementary/12955_2009_656_MOESM6_ESM.pdf/9561016)
Supplement: MOESM6 [file 9561016]

**Scores on NEI-VFQ Subscales: Factor "Intact central visual field"**

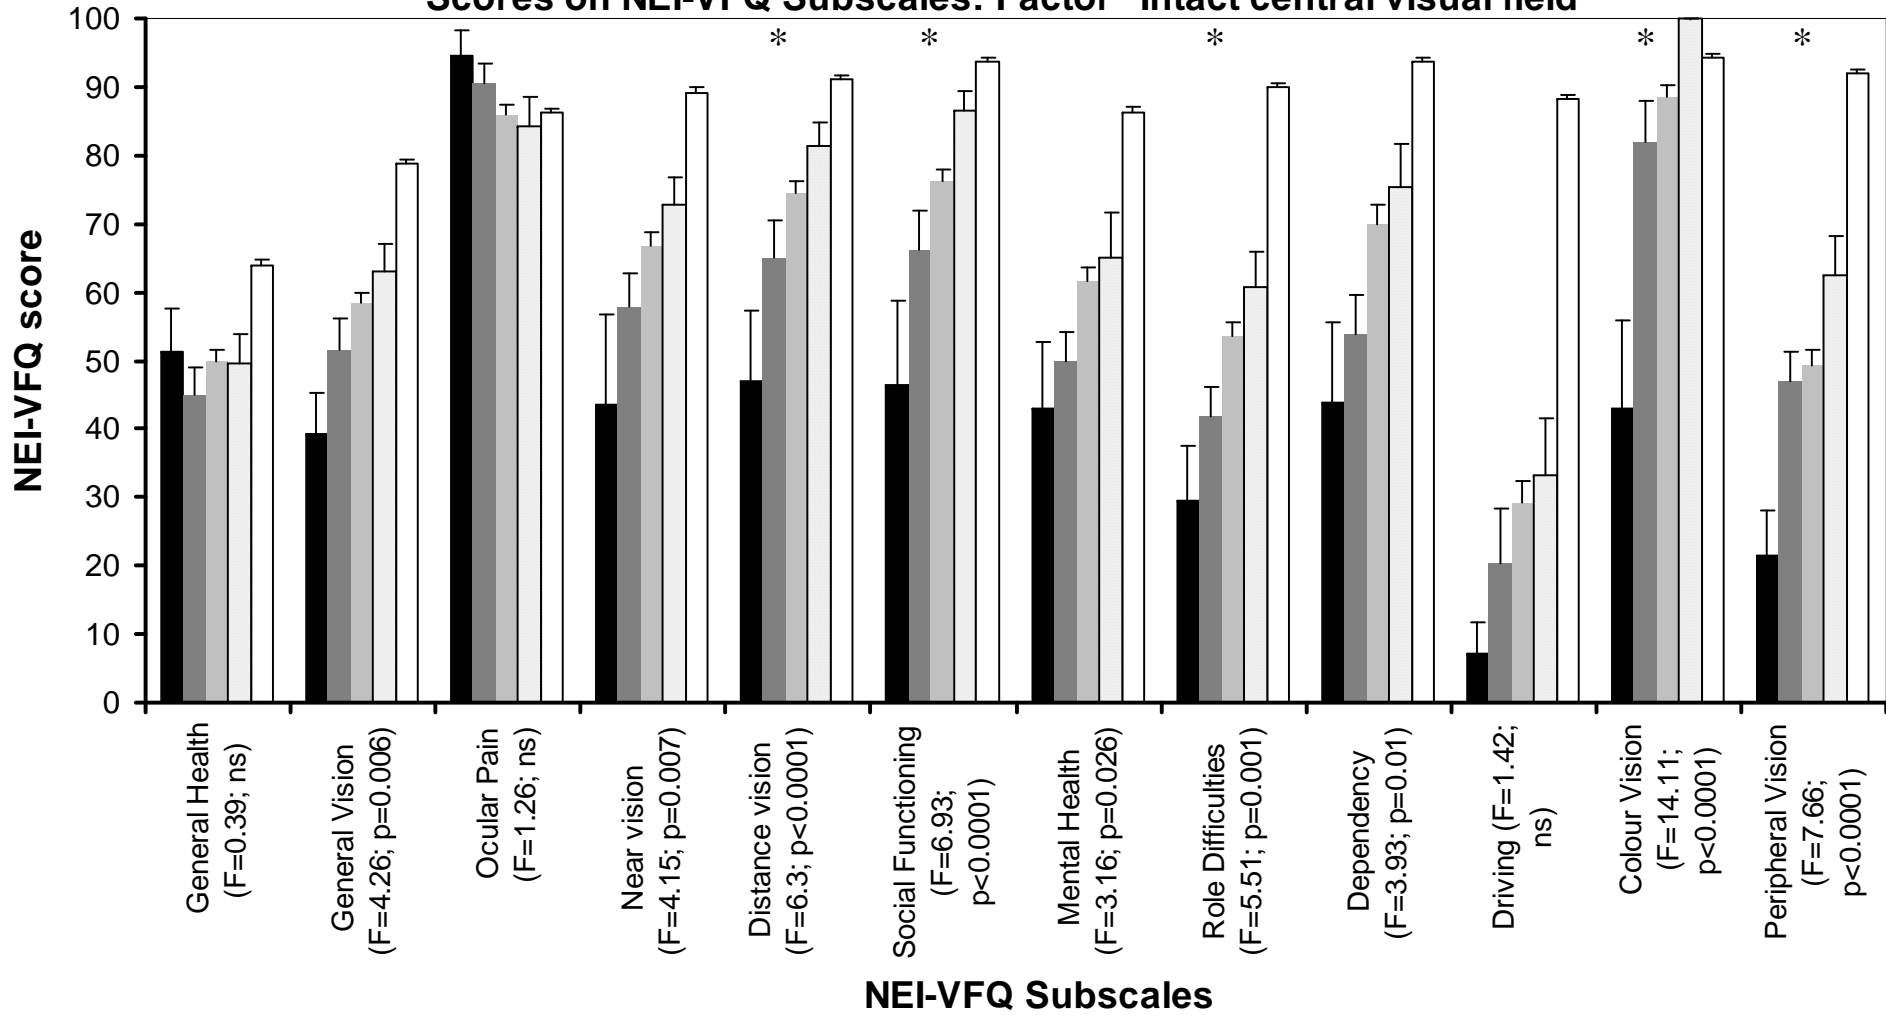

■ 0% > intact visual field > 25%    ■ 25% > intact visual field > 50%  
 ■ 50% > intact visual field > 75%    ■ >75% intact visual field  
 □ Healthy reference group
